# Supplementary material for: Assessing Global Evidence on Cost-Effectiveness to Inform Development of Pakistan’s Essential Package of Health Services
Source: PubMed Central journal article supplement (PMC11607590; doi:10.34172/ijhpm.2023.8005), 2024-01-07
Supplement: ijhpm-13-8005-s002.pdf [file ijhpm-13-8005-s002.pdf]

**Article title:** Assessing global evidence on cost-effectiveness to inform development of Pakistan’s Essential Package of Health Services

**Journal name:** International Journal of Health Policy and Management (IJHPM)

**Authors’ information:** Maryam Huda<sup>1</sup>, Nichola Kitson<sup>2</sup>, Nuru Saadi<sup>2</sup>, Saira Kanwal<sup>3</sup>, Urooj Gul<sup>3</sup>, Maarten Jansen<sup>4</sup>, Sergio Torres-Rueda<sup>2</sup>, Rob Baltussen<sup>5</sup>, Ala Alwan<sup>6</sup>, Sameen Siddiqi<sup>1</sup>, Anna Vassall<sup>2\*</sup>

<sup>1</sup>Department of Community Health Sciences, Aga Khan University, Karachi, Pakistan.

<sup>2</sup>Department of Global Health and Development, London School of Hygiene and Tropical Medicine, London, UK.

<sup>3</sup>Health Planning Systems Strengthening and Information Analysis Unit (HPSIU), Ministry of National Health Services Regulations and Coordination, Islamabad, Pakistan.

<sup>4</sup>Department of Health Evidence, Radboud Institute of Health Sciences, Radboud University Medical Centre, Nijmegen, The Netherlands.

<sup>5</sup>Department of Health Evidence, Radboud University Medical Centre, Nijmegen, The Netherlands.

<sup>6</sup>DCP3 Country Translation Project, London School of Hygiene and Tropical Medicine, London, UK.

**\*Correspondence to:** Anna Vassall; Email: [Anna.Vassall@lshtm.ac.uk](mailto:Anna.Vassall@lshtm.ac.uk)

**Citation:** Huda M, Kitson N, Saadi N, et al. Assessing global evidence on cost-effectiveness to inform development of Pakistan’s essential package of health services. Int J Health Policy Manag. 2024;13:8005. doi:[10.34172/ijhpm.2023.8005](https://doi.org/10.34172/ijhpm.2023.8005)

**Supplementary file 2**

**Table S2 – Detailed list of final ICERs**

| Intervention name                                              | Geography: Pakistan/ South Asia/ Other LMIC | Exact OR Partial Match | Quality Scoring (1, 2 OR 3 stars) | FINAL ICER Value | ICER Source                            |
|----------------------------------------------------------------|---------------------------------------------|------------------------|-----------------------------------|------------------|----------------------------------------|
| Antenatal and postpartum education on birth spacing            | Pakistan                                    | Partial                | ***                               | 40               | Tufts GH-CEA registry                  |
| Education on handwashing and safe disposal of children’s stool | South Asia                                  | Partial                | **                                | 24               | Tufts GH-CEA registry                  |
| Pneumococcus vaccination                                       | South Asia                                  | Exact                  | **                                | 524              | Tufts GH-CEA registry, with adjustment |
| Rotavirus vaccination                                          | Pakistan                                    | Exact                  | ***                               | 6620             | Tufts GH-CEA registry, with adjustment |

|                                                                                                                                                                      |            |               |     |      |                                                   |
|----------------------------------------------------------------------------------------------------------------------------------------------------------------------|------------|---------------|-----|------|---------------------------------------------------|
| Vitamin A and zinc for children                                                                                                                                      | South Asia | Partial       | **  | 950  | Tufts GH-CEA registry, with adjustment            |
| Childhood vaccination series (diphtheria, pertussis, tetanus, polio, BCG, measles, hepatitis B, HiB)                                                                 | LMIC       | Partial       | **  | 85   | Tufts GH-CEA registry                             |
| Indoor residual spraying                                                                                                                                             |            | Default value | *   | 151  | DCP3 Annex 7a, with adjustment                    |
| Education of schoolchildren on oral health                                                                                                                           |            | Default value | *   | 757  | DCP3 - No evidence, middle calculated York method |
| Vision pre-screening by teachers; vision tests and provision of ready-made glasses on-site by eye specialists/ trained medical officer                               | LMIC       | Partial       | **  | 160  | Tufts GH-CEA registry                             |
| Counselling of mothers on providing thermal care for pre-term new-borns (delayed bath and skin to skin contact)                                                      | South Asia | Partial       | **  | 38   | Tufts GH-CEA registry                             |
| School based HPV vaccination for girls                                                                                                                               | Pakistan   | Exact         | *** | 2095 | Tufts GH-CEA registry, with adjustment            |
| Mass drug administration (NTDs)                                                                                                                                      |            | Default value | *   | 3670 | DCP3 Annex 7a, with adjustment                    |
| Adolescent-friendly services for STIs                                                                                                                                |            | Default value | *   | 757  | DCP3 - No evidence, middle calculated York method |
| Life skills training in schools                                                                                                                                      |            | Default value | *   | 757  | DCP3 - No evidence, middle calculated York method |
| Provision of iron and folic acid supplementation to pregnant women, and provision of food or caloric supplementation to pregnant women in food-insecurity households | South Asia | Exact         | **  | 186  | Tufts GH-CEA registry                             |
| Provision of iron and folic acid supplementation to pregnant women, and provision of food or caloric supplementation to pregnant women in food-insecurity households | South Asia | Exact         | **  | 186  | Tufts GH-CEA registry                             |

|                                                                                                                                                                                       |            |               |     |     |                                                   |
|---------------------------------------------------------------------------------------------------------------------------------------------------------------------------------------|------------|---------------|-----|-----|---------------------------------------------------|
| Community-based HIV testing and counseling (for example, mobile units and venue-based testing), with appropriate referral or linkage to care and immediate initiation of lifelong ART | Pakistan   | Partial       | *** | 200 | Tufts GH-CEA registry                             |
| Provision of condoms to key populations, including female sex workers, men have sex with men, people who inject drugs (IDU), transgender populations, and prisoners                   | Pakistan   | Partial       | *** | 200 | Tufts GH-CEA registry                             |
| Provision of Disposable syringes who inject drugs (IDU)                                                                                                                               | Pakistan   | Partial       | *** | 200 | Tufts GH-CEA registry                             |
| TB contact tracing                                                                                                                                                                    |            | Default value | *   | 757 | DCP3 - No evidence, middle calculated York method |
| Test of malaria suspects and treatment                                                                                                                                                |            | Default value | *   | 757 | DCP3 - No evidence, middle calculated York method |
| Environmental management for malaria                                                                                                                                                  |            | Default value | *   | 222 | DCP3 Annex 7a                                     |
| Low-risk labor and delivery                                                                                                                                                           |            | Default value | *   | 1   | DCP3 Annex 7a                                     |
| Basic neonatal resuscitation following delivery                                                                                                                                       |            | Default value | *   | 1   | DCP3 Annex 7a                                     |
| Management of labour and delivery in low risk women by skilled attendants                                                                                                             |            | Default value | *   | 3   | DCP3 Annex 7a, with adjustment                    |
| Basic neonatal resuscitation following delivery                                                                                                                                       |            | Default value | *   | 1   | DCP3 Annex 7a                                     |
| Promotion of breastfeeding or complementary feeding by community health workers                                                                                                       | South Asia | Partial       | **  | 38  | Tufts GH-CEA registry                             |
| Mass drug administration (malaria)                                                                                                                                                    |            | Default value | *   | 121 | DCP3 Annex 7a, with adjustment                    |
| Early detection and treatment of NTDs                                                                                                                                                 | South Asia | Partial       | **  | 740 | Tufts GH-CEA registry, with adjustment            |
| Identify and refer patients with high risk                                                                                                                                            |            | Default value | *   | 757 | DCP3 - No evidence, middle calculated York method |

|                                                                                                            |            |               |    |      |                                                   |
|------------------------------------------------------------------------------------------------------------|------------|---------------|----|------|---------------------------------------------------|
| Guidance during infectious outbreak                                                                        |            | Default value | *  | 757  | DCP3 - No evidence, middle calculated York method |
| Exercise-based pulmonary rehabilitation                                                                    |            | Default value | *  | 757  | DCP3 - No evidence, middle calculated York method |
| Self-managed treatment of migraine                                                                         |            | Default value | *  | 757  | DCP3 - No evidence, middle calculated York method |
| Tetanus toxoid immunization among schoolchildren and among women attending antenatal care                  | South Asia | Partial       | ** | 226  | Tufts GH-CEA registry, with adjustment            |
| Parent training of high-risk families, including nurse home visitation for child maltreatment              |            | Default value | *  | 757  | DCP3 - No evidence, middle calculated York method |
| WASH behavior change interventions                                                                         |            | Default value | *  | 757  | DCP3 - No evidence, middle calculated York method |
| ECD rehabilitation interventions                                                                           |            | Default value | *  | 757  | DCP3 - No evidence, middle calculated York method |
| Early childhood development rehabilitation interventions including motor, sensory and language stimulation |            | Default value | *  | 757  | DCP3 - No evidence, middle calculated York method |
| Interventions for wheelchair users                                                                         |            | Default value | *  | 757  | DCP3 - No evidence, middle calculated York method |
| Acute severe malnutrition management                                                                       | South Asia | Partial       | ** | 1030 | Tufts GH-CEA registry, with adjustment            |
| Integrated community case management                                                                       |            | Default value | *  | 757  | DCP3 - No evidence, middle calculated York method |

|                                                                                                                                                                                                           |            |               |    |      |                                                                     |
|-----------------------------------------------------------------------------------------------------------------------------------------------------------------------------------------------------------|------------|---------------|----|------|---------------------------------------------------------------------|
| Care for fetal growth restriction                                                                                                                                                                         |            | Default value | *  | 757  | DCP3 - No evidence, middle calculated York method                   |
| Surgical termination of pregnancy                                                                                                                                                                         |            | Default value | *  | 757  | DCP3 - No evidence, middle calculated York method                   |
| Full supportive care for severe childhood infections with danger signs                                                                                                                                    |            | Default value | *  | 757  | DCP3 - No evidence, middle calculated York method                   |
| Management of severe acute malnutrition associated with serious infections                                                                                                                                | South Asia | Partial       | ** | 860  | Tufts GH-CEA registry, with adjustment                              |
| Early detection and treatment of early stage cervical cancer (Also included in HIV and Cancer packages of services)                                                                                       | LMIC       | Exact         | ** | 390  | Tufts GH-CEA registry                                               |
| Insertion and removal of long-lasting contraceptives(IUDs and Implants)(Also included in Surgery package of services)                                                                                     |            | Default value | *  | 757  | DCP3 - No evidence, middle calculated York method                   |
| Tubal ligation                                                                                                                                                                                            |            | Default value | *  | 1150 | DCP3 - No evidence, middle calculated York method , with adjustment |
| Vasectomy                                                                                                                                                                                                 |            | Default value | *  | 757  | DCP3 - No evidence, middle calculated York method                   |
| Referral of cases of treatment failure for drug susceptibility testing; enrolment of those with MDR-TB for treatment per WHO guidelines (either short or long term regimen)                               |            | Default value | *  | 220  | DCP3 Annex 7a                                                       |
| Evaluation and management of fever in clinically unstable individuals using WHO IMAI guidelines, including empiric parenteral antimicrobials and antimalarial and resuscitative measures for septic shock | LMIC       | Partial       | ** | 1    | Tufts GH-CEA registry                                               |

|                                                                                                                                                                          |      |               |    |       |                                                                     |
|--------------------------------------------------------------------------------------------------------------------------------------------------------------------------|------|---------------|----|-------|---------------------------------------------------------------------|
| Induction of labor post-term                                                                                                                                             |      | Default value | *  | 757   | DCP3 - No evidence, middle calculated York method                   |
| Management of acute coronary syndromes with aspirin, unfractionated heparin and generic thrombolytic (when indicated)                                                    |      | Default value | *  | 3215  | DCP3 Annex 7a                                                       |
| Management of acute coronary exacerbations of asthma and COPD using systemic steroids, inhaled beta-agonists and if indicated oral antibiotics and oxygen therapy        | LMIC | Exact         | ** | 11000 | Tufts GH-CEA registry                                               |
| Medical management of acute heart failure                                                                                                                                | LMIC | partial       | ** | 195   | Tufts GH-CEA registry, with adjustment                              |
| Bowel obstruction management                                                                                                                                             |      | Default value | *  | 52    | DCP3 Annex 7a, with adjustment                                      |
| Secondary prevention of osteoporosis                                                                                                                                     |      | Default value | *  | 1530  | DCP3 - No evidence, middle calculated York method , with adjustment |
| Therapy for moderate to severe arthritis                                                                                                                                 |      | Default value | *  | 420   | DCP3 Annex 7a, with adjustment                                      |
| In settings where sickle cell disease is a public health concern, universal new born screening followed by standard prophylaxis against bacterial infections and malaria | LMIC | Exact         | ** | 200   | Tufts GH-CEA registry                                               |
| Identification of genetic disorders                                                                                                                                      |      | Default value | *  | 757   | DCP3 - No evidence, middle calculated York method                   |
| Jaundice management with phototherapy                                                                                                                                    |      | Default value | *  | 757   | DCP3 - No evidence, middle calculated York method                   |
| Management of intoxication / poisoning syndromes using widely available agents e.g. charcoal, naloxone, bicarbonate, antivenin                                           |      | Default value | *  | 757   | DCP3 - No evidence, middle calculated York method                   |

|                                                                                                    |      |               |    |       |                                        |
|----------------------------------------------------------------------------------------------------|------|---------------|----|-------|----------------------------------------|
| Appendectomy                                                                                       | LMIC | Exact         | ** | 1370  | Tufts GH-CEA registry, with adjustment |
| Assisted vaginal delivery using vacuum extraction or forceps                                       | LMIC | Partial       | ** | 890   | Tufts GH-CEA registry, with adjustment |
| Craniotomy for trauma                                                                              | LMIC | Partial       | ** | 200   | Tufts GH-CEA registry                  |
| Colostomy                                                                                          |      | Default value | *  | 60    | DCP3 Annex 7a                          |
| Escharotomy or fasciotomy (Adults)                                                                 | LMIC | Partial       | ** | 193   | Tufts GH-CEA registry, with adjustment |
| Fracture reduction                                                                                 | LMIC | Exact         | ** | 110   | Tufts GH-CEA registry                  |
| Hernia repair including emergency surgery                                                          | LMIC | Exact         | ** | 760   | Tufts GH-CEA registry, with adjustment |
| Hernia repair including emergency surgery for neonates and infants                                 | LMIC | Partial       | ** | 7     | Tufts GH-CEA registry                  |
| Hysterectomy for uterine rupture or intractable postpartum haemorrhage                             | LMIC | Exact         | ** | 30    | Tufts GH-CEA registry, with adjustment |
| Irrigation and debridement of open fractures                                                       |      | Default value | *  | 287   | DCP3 Annex 7a                          |
| Management of eclampsia with magnesium sulphate, including initial stabilization at health centres | LMIC | Partial       | ** | 103   | Tufts GH-CEA registry, with adjustment |
| Osteomyelitis management                                                                           |      | Default value | *  | 559   | DCP3 Annex 7a                          |
| Management of septic arthritis                                                                     | LMIC | Partial       | ** | 370   | Tufts GH-CEA registry                  |
| Placement of external fixator and use of traction for fractures                                    | LMIC | Partial       | ** | 370   | Tufts GH-CEA registry                  |
| Placement of external fixator and use of traction for fractures of Children                        | LMIC | Partial       | ** | 370   | Tufts GH-CEA registry                  |
| Relief of urinary obstruction                                                                      |      | Default value | *  | 510   | DCP3 Annex 7a, with adjustment         |
| Removal of gallbladder, including emergency surgery                                                | LMIC | Partial       | ** | 240   | Tufts GH-CEA registry, with adjustment |
| Repair of perforations (for example perforated peptic ulcer, typhoid ileal perforation)            | LMIC | Partial       | ** | 12.25 | Tufts GH-CEA registry, with adjustment |

|                                                                                                                                                                  |            |               |     |       |                                                   |
|------------------------------------------------------------------------------------------------------------------------------------------------------------------|------------|---------------|-----|-------|---------------------------------------------------|
| Resuscitation with advanced measures                                                                                                                             |            | Default value | *   | 757   | DCP3 - No evidence, middle calculated York method |
| Basic Skin grafting                                                                                                                                              | LMIC       | Partial       | **  | 560   | Tufts GH-CEA registry                             |
| Trauma laparotomy                                                                                                                                                | LMIC       | Exact         | **  | 14    | Tufts GH-CEA registry                             |
| Trauma laparotomy in Children                                                                                                                                    | LMIC       | Partial       | **  | 14    | Tufts GH-CEA registry                             |
| Trauma related amputations                                                                                                                                       |            | Default value | *   | 23    | DCP3 Annex 7a                                     |
| Management of maternal sepsis, including early detection at health centres                                                                                       | LMIC       | Partial       | **  | 940   | Tufts GH-CEA registry, with adjustment            |
| Tube thoracostomy                                                                                                                                                |            | Default value | *   | 757   | DCP3 - No evidence, middle calculated York method |
| Compression therapy for amputations, burns, and vascular or lymphatic disorders                                                                                  | LMIC       | Partial       | **  | 0     | Tufts GH-CEA registry                             |
| Acute management of swallowing dysfunction                                                                                                                       |            | Default value | *   | 757   | DCP3 - No evidence, middle calculated York method |
| Management of new-born complications, neonatal meningitis, and other very serious infections requiring continuous supportive care (such as IV fluids and oxygen) | LMIC       | Partial       | **  | 26    | Tufts GH-CEA registry, with adjustment            |
| Management of preterm labour with corticosteroids, including early detection at health centres                                                                   | LMIC       | Partial       | **  | 25000 | Tufts GH-CEA registry                             |
| Management of labour and delivery in high-risk women, including operative delivery (CEmONC) (Also included in Surgery package of services)                       |            | Default value | *   | 2592  | DCP3 Annex 7a                                     |
| Surgery for ectopic pregnancy (Also included in Surgery package of services)                                                                                     | LMIC       | Partial       | **  | 58    | Tufts GH-CEA registry, with adjustment            |
| Early detection and treatment of neonatal pneumonia with oral antibiotics                                                                                        | Pakistan   | Partial       | *** | 29    | Tufts GH-CEA registry                             |
| Diabetes screening and care in pregnancy                                                                                                                         | South Asia | Partial       | **  | 1800  | Tufts GH-CEA registry                             |



|                                                                                                                                                                                                                                                                                         |            |               |     |        |                                                   |
|-----------------------------------------------------------------------------------------------------------------------------------------------------------------------------------------------------------------------------------------------------------------------------------------|------------|---------------|-----|--------|---------------------------------------------------|
| BEmNOC                                                                                                                                                                                                                                                                                  |            | Default value | *   | 187    | DCP3 Annex 7a                                     |
| Detection and treatment of childhood infections with danger signs (IMCI)                                                                                                                                                                                                                | Pakistan   | Partial       | *** | 16     | Tufts GH-CEA registry                             |
| Among all individuals who are known to be HIV+, immediate ART initiation with regular monitoring of viral load for (Also included in HIV package of services)                                                                                                                           | LMIC       | Exact         | **  | 2700   | Tufts GH-CEA registry                             |
| Psychological treatment for mood, anxiety, ADHD and disruptive behaviour disorders in adolescents                                                                                                                                                                                       | South Asia | Partial       | **  | 3375   | Tufts GH-CEA registry                             |
| Post-gender-based violence care, including counselling, provision of emergency contraception, and rape-response referral (medical and judicial)                                                                                                                                         | LMIC       | Partial       | **  | 844.03 | Tufts/ICD-10                                      |
| Management of sexual and reproductive tract infections                                                                                                                                                                                                                                  |            | Default value | *   | 128    | DCP3 Annex 7a, with adjustment                    |
| For individuals testing positive for hepatitis B and C, assessment of treatment eligibility by trained providers followed by initiation and monitoring of ART when indicated                                                                                                            | South Asia | Partial       | **  | 425    | Tufts GH-CEA registry, with adjustment            |
| Miscarriage and abortions management                                                                                                                                                                                                                                                    |            | Default value | *   | 757    | DCP3 - No evidence, middle calculated York method |
| Hepatitis B and C testing and referral                                                                                                                                                                                                                                                  |            | Exact         | *   | 353    | Paper from peter                                  |
| Partner notification and expedited treatment for common STIs including HIV                                                                                                                                                                                                              | South Asia | Partial       | **  | 109    | Tufts GH-CEA registry                             |
| Provider-initiated testing and counselling for HIV, STIs and hepatitis for all in contact with the health system in high-prevalence setting, including prenatal care with appropriate referral/ linkages to care including immediate ART initiation for those testing positives for HIV | Pakistan   | Partial       | *** | 300    | Tufts GH-CEA registry                             |

|                                                                                                                                                                                                                                                                      |            |               |     |      |                                                   |
|----------------------------------------------------------------------------------------------------------------------------------------------------------------------------------------------------------------------------------------------------------------------|------------|---------------|-----|------|---------------------------------------------------|
| Hepatitis B vaccination for high risk populations, including healthcare workers, IDU, MSM, household contacts and partners with multiple sex partners (Also included in Cancer package of services)                                                                  | LMIC       | Partial       | **  | 270  | Tufts GH-CEA registry                             |
| Medical male circumcision                                                                                                                                                                                                                                            |            | Default value | *   | 757  | DCP3 - No evidence, middle calculated York method |
| IPT for TB contacts                                                                                                                                                                                                                                                  | South Asia | Partial       | **  | 190  | Tufts GH-CEA registry                             |
| Diagnosis of TB and first-line treatment                                                                                                                                                                                                                             | LMIC       | Partial       | **  | 17   | TB Paper, with adjustment                         |
| Screening of HIV in all individuals with a diagnosis of active TB; if HIV infection is present, start (or refer for) ARV treatment and HIV care                                                                                                                      | South Asia | Partial       | **  | 3    | Tufts/ICD-10 - negative value, adjustment made    |
| Screening for latent TB infection following a new diagnosis of HIV, followed by yearly screening among PLHIV at high risk of TB exposure; initiation of isoniazid preventive therapy among all individuals who screen positive but do not have evidence of active TB | South Asia | Partial       | **  | 1    | Tufts/ICD-10 - negative value, adjustment made    |
| Preterm premature rupture management                                                                                                                                                                                                                                 |            | Default value | *   | 2128 | DCP3 Annex 7a                                     |
| Fever management for clinically stable                                                                                                                                                                                                                               |            | Default value | *   | 757  | DCP3 - No evidence, middle calculated York method |
| Provision of insecticide treated nets to under five children and pregnant women attending health centres                                                                                                                                                             | Pakistan   | Partial       | *** | 200  | Tufts GH-CEA registry                             |
| Identify and refer for progressive illness                                                                                                                                                                                                                           |            | Default value | *   | 757  | DCP3 - No evidence, middle calculated York method |
| Therapy for CVD risk factors                                                                                                                                                                                                                                         |            | Default value | *   | 757  | DCP3 - No evidence, middle calculated York method |

|                                                                                                                                                             |            |               |     |          |                                                   |
|-------------------------------------------------------------------------------------------------------------------------------------------------------------|------------|---------------|-----|----------|---------------------------------------------------|
| Low-dose inhaled corticosteroids and bronchodilators for asthma and for selected patients with COPD                                                         | South Asia | Exact         | **  | 17626.34 | Tufts/ICD-10                                      |
| Provision of aspirin for all cases of suspected acute myocardial infarction                                                                                 | South Asia | Partial       | **  | 310      | Tufts GH-CEA registry                             |
| Screening for kidney disease                                                                                                                                |            | Default value | *   | 6116     | DCP3 Annex 7a                                     |
| Management of albuminuric kidney disease with ACEi                                                                                                          |            | Default value | *   | 6116     | DCP3 Annex 7a                                     |
| Secondary prophylaxis for rheumatic fever                                                                                                                   |            | Default value | *   | 757      | DCP3 - No evidence, middle calculated York method |
| Treatment of acute pharyngitis                                                                                                                              |            | Default value | *   | 15       | DCP3 Annex 7a                                     |
| Opportunistic screening for hypertension for all adults and initiation of treatment among individuals with severe hypertension and/or multiple risk factors | South Asia | Partial       | **  | 400      | Tufts GH-CEA registry                             |
| Tobacco cessation counselling and use of nicotine replacement therapy in certain circumstances                                                              | South Asia | Partial       | **  | 210      | Tufts GH-CEA registry                             |
| Support for caregivers of dementia patients                                                                                                                 |            | Default value | *   | 757      | DCP3 - No evidence, middle calculated York method |
| Bipolar disorder management                                                                                                                                 |            | Default value | *   | 1905     | DCP3 Annex 7a                                     |
| Provision of condoms, hormonal contraceptives including emergency contraceptives and IUDs                                                                   | Pakistan   | Partial       | *** | 200      | Tufts GH-CEA registry                             |
| Provision of condoms, hormonal contraceptives including emergency contraceptives and IUDs                                                                   | Pakistan   | Partial       | *** | 200      | Tufts GH-CEA registry                             |
| Management of depression and anxiety disorders with psychological and generic antidepressants therapy                                                       | South Asia | Partial       | **  | 4591     | Tufts GH-CEA registry                             |
| Screening and brief alcohol intervention                                                                                                                    | South Asia | Partial       | **  | 4591     | Tufts GH-CEA registry                             |
| Primary prevention of osteoporosis                                                                                                                          |            | Default value | *   | 757      | DCP3 - No evidence, middle calculated York method |

|                                                                                                           |            |               |     |      |                                                                     |
|-----------------------------------------------------------------------------------------------------------|------------|---------------|-----|------|---------------------------------------------------------------------|
| Targeted screening for congenital hearing loss in high-risk children, using optoacoustic testing otoscope | South Asia | Partial       | **  | 1300 | Tufts GH-CEA registry                                               |
| Dental extraction                                                                                         |            | Default value | *   | 700  | DCP3 - No evidence, middle calculated York method , with adjustment |
| Dental extraction (FLH)                                                                                   |            | Default value | *   | 757  | DCP3 - No evidence, middle calculated York method                   |
| Drainage of dental abscess                                                                                |            | Default value | *   | 1780 | DCP3 - No evidence, middle calculated York method , with adjustment |
| Drainage of dental abscess (FLH)                                                                          |            | Default value | *   | 3100 | DCP3 - No evidence, middle calculated York method , with adjustment |
| Drainage of superficial abscess                                                                           |            | Default value | *   | 1501 | DCP3 - No evidence, middle calculated York method , with adjustment |
| Counseling on kangaroo care for newborns                                                                  |            | Default value | *   | 301  | DCP3 Annex 7a                                                       |
| Counselling of mothers on providing kangaroo care of newborns                                             |            | Default value | *   | 301  | DCP3 Annex 7a                                                       |
| Care for neonatal sepsis, pneumonia, meningitis                                                           | Pakistan   | Partial       | *** | 75   | Tufts GH-CEA registry                                               |
| Non-displaced fractures management                                                                        |            | Default value | *   | 757  | DCP3 - No evidence, middle calculated York method                   |
| Resuscitation with basic measures                                                                         |            | Default value | *   | 757  | DCP3 - No evidence, middle calculated York method                   |

|                                                                                                                                                       |            |               |    |       |                                                                     |
|-------------------------------------------------------------------------------------------------------------------------------------------------------|------------|---------------|----|-------|---------------------------------------------------------------------|
| Suturing laceration                                                                                                                                   |            | Default value | *  | 757   | DCP3 - No evidence, middle calculated York method                   |
| Treatment of caries                                                                                                                                   |            | Default value | *  | 4650  | DCP3 - No evidence, middle calculated York method , with adjustment |
| Treatment of caries (FLH)                                                                                                                             |            | Default value | *  | 4550  | DCP3 - No evidence, middle calculated York method , with adjustment |
| Basic management of MNIs and disorders                                                                                                                |            | Default value | *  | 7583  | DCP3 Annex 7a                                                       |
| Psychosocial support and counseling                                                                                                                   |            | Default value | *  | 757   | DCP3 - No evidence, middle calculated York method                   |
| Pharmacological termination of pregnancy                                                                                                              |            | Default value | *  | 59    | DCP3 Annex 7a, with adjustment                                      |
| Care for hypertensive disorders in pregnancy                                                                                                          |            | Default value | *  | 92504 | DCP3 Annex 7a                                                       |
| Screening and management of hypertensive disorders in pregnancy                                                                                       |            | Default value | *  | 92504 | DCP3 Annex 7a                                                       |
| TB ACF and linkage to care                                                                                                                            | South Asia | Partial       | ** | 2500  | Tufts GH-CEA registry                                               |
| Full supportive care for preterm new-borns                                                                                                            | LMIC       | Partial       | ** | 58    | Tufts GH-CEA registry                                               |
| Elective surgical repair of common orthopaedic injuries (for example meniscal and ligamentous tears) in individuals with severe functional limitation | LMIC       | Partial       | ** | 110   | Tufts GH-CEA registry                                               |
| Urgent, definitive surgical management of orthopaedic injuries (for example open reduction and internal fixation)                                     | LMIC       | Partial       | ** | 370   | Tufts GH-CEA registry                                               |
| Repair of cleft lip and cleft palate                                                                                                                  |            | Default value | *  | 7900  | DCP3 Annex 7a, with adjustment                                      |

|                                                                                                          |      |               |    |       |                                                   |
|----------------------------------------------------------------------------------------------------------|------|---------------|----|-------|---------------------------------------------------|
| Repair of club foot                                                                                      |      | Default value | *  | 111   | DCP3 Annex 7a, with adjustment                    |
| Cataract extraction and insertion of intraocular lens                                                    | LMIC | Exact         | ** | 1600  | Tufts GH-CEA registry, with adjustment            |
| Repair of anorectal malformations                                                                        |      | Default value | *  | 757   | DCP3 - No evidence, middle calculated York method |
| Repair of obstetric fistula                                                                              |      | Default value | *  | 757   | DCP3 - No evidence, middle calculated York method |
| Insertion of shunt for hydrocephalus                                                                     |      | Default value | *  | 158   | DCP3 Annex 7a                                     |
| Surgery for Trachomatous Trichiasis                                                                      | LMIC | Exact         | ** | 370   | Tufts GH-CEA registry                             |
| Referral level hospital pathology services                                                               |      | Default value | *  | 757   | DCP3 - No evidence, middle calculated York method |
| Specialized TB services, including management of MDR- and XDR-TB treatment failure and surgery for TB    |      | Default value | *  | 757   | DCP3 - No evidence, middle calculated York method |
| Speciality pathology services                                                                            |      | Default value | *  | 757   | DCP3 - No evidence, middle calculated York method |
| Management of refractory febrile illness including etiologic diagnosis at reference microbial laboratory |      | Default value | *  | 757   | DCP3 - No evidence, middle calculated York method |
| Management of acute ventilator failure due to acute exacerbations of asthma and COPD                     | LMIC | Exact         | ** | 11000 | Tufts GH-CEA registry                             |
| Retinopathy screening via telemedicine, followed by treatment using laser photocoagulation               | LMIC | Exact         | ** | 220   | Tufts GH-CEA registry                             |

|                                                                                                                                                                                                                                |      |               |    |      |                       |
|--------------------------------------------------------------------------------------------------------------------------------------------------------------------------------------------------------------------------------|------|---------------|----|------|-----------------------|
| Use of percutaneous coronary intervention for acute myocardial infarction where resources permits                                                                                                                              |      | Default value | *  | 673  | DCP3 Annex 7a         |
| Treatment of early stage breast cancer with appropriate multimodal approaches (including generic chemotherapy) with curative intent for cases detected by clinical examination at health centres and first level hospitals     | LMIC | Partial       | ** | 6500 | Tufts GH-CEA registry |
| Treatment of early stage colorectal cancer with appropriate multimodal approaches (including generic chemotherapy) with curative intent for cases detected by clinical examination at health centres and first level hospitals | LMIC | Exact         | ** | 750  | Tufts GH-CEA registry |
| Treatment of early stage childhood cancers (such as Burkitt and Hodgkin lymphoma, acute lymphoblastic leukaemia, retinoblastoma and Wilms tumour) with curative intent in paediatric cancer units or hospitals                 | LMIC | Partial       | ** | 1100 | Tufts GH-CEA registry |

**Table S3: List of 13 interventions by cluster and platform which fulfilled all the 3 criteria of quality, technology, and comparator.**

| Interventions                                                                                        | Cluster | Platform        | Quality | Technology | Comparator |
|------------------------------------------------------------------------------------------------------|---------|-----------------|---------|------------|------------|
| Antenatal and postpartum education on birth spacing                                                  | RMNCH   | Community level | ✓       | ✓          | ✓          |
| Childhood vaccination series (diphtheria, pertussis, tetanus, polio, BCG, measles, hepatitis B, HiB) | RMNCH   | Community level | ✓       | ✓          | ✓          |
| Counselling of mothers on                                                                            | RMNCH   | Community       | ✓       | ✓          | ✓          |

|                                                                                                                                                 |                       |                 |   |   |   |
|-------------------------------------------------------------------------------------------------------------------------------------------------|-----------------------|-----------------|---|---|---|
| providing thermal care for pre-term new-borns (delayed bath and skin to skin contact)                                                           |                       | level           |   |   |   |
| Promotion of breastfeeding or complementary feeding by community health workers                                                                 | RMNCH                 | Community level | ✓ | ✓ | ✓ |
| Early detection and treatment of NTDs                                                                                                           | Communicable diseases | Community level | ✓ | ✓ | ✓ |
| Acute severe malnutrition management                                                                                                            | RMNCH                 | Community level | ✓ | ✓ | ✓ |
| Detection and treatment of childhood infections with danger signs (IMCI)                                                                        | RMNCH                 | Health Center   | ✓ | ✓ | ✓ |
| Post-gender-based violence care, including counselling, provision of emergency contraception, and rape-response referral (medical and judicial) | RMNCH                 | Health Center   | ✓ | ✓ | ✓ |
| Partner notification and expedited treatment for common STIs including HIV                                                                      | Communicable diseases | Health Center   | ✓ | ✓ | ✓ |
| Screening of HIV in all individuals with a diagnosis of active TB; if HIV infection is present, start (or refer for) ARV treatment and HIV care | Communicable diseases | Community level | ✓ | ✓ | ✓ |



|                                                                                                                                                                                                                                                                      |                       |               |   |   |   |
|----------------------------------------------------------------------------------------------------------------------------------------------------------------------------------------------------------------------------------------------------------------------|-----------------------|---------------|---|---|---|
| Screening for latent TB infection following a new diagnosis of HIV, followed by yearly screening among PLHIV at high risk of TB exposure; initiation of isoniazid preventive therapy among all individuals who screen positive but do not have evidence of active TB | Communicable diseases | Health Center | ✓ | ✓ | ✓ |
| Provision of aspirin for all cases of suspected acute myocardial infarction                                                                                                                                                                                          | NCD & IPC             | Health Center | ✓ | ✓ | ✓ |
| Management of depression and anxiety disorders with psychological and generic antidepressants therapy                                                                                                                                                                | NCD & IPC             | Health Center | ✓ | ✓ | ✓ |
